# Supplementary material for: Defect management by a cesium fluoride-modified electron transport layer promotes perovskite solar cells
Source: Royal Society of Chemistry journal article supplement (doi:10.1039/d2cp03207d), 2022-01-01
Supplement: d2cp03207d1.pdf [file d2cp03207d1.pdf]

**Supplementary information**

**Defect Management by Cesium Fluoride-modified  
Electron Transport Layer Promotes Perovskite  
Solar Cells**

Xiangning Xu,<sup>‡a</sup> Zhichao Lin,<sup>‡a</sup> Qingbin Cai,<sup>a</sup> Hongye Dong,<sup>a</sup> Xinli Wang<sup>a</sup> and Cheng Mu<sup>\*a</sup>

<sup>a</sup> Key Laboratory of Advanced Light Conversion Materials and Biophotonics, Department of Chemistry Renmin University of China, Beijing, 100872, P. R. China.

**Table S1.** Band gap ( $E_g$ ), secondary-electron cut-off ( $E_{\text{cut-off}}$ ), Fermi level ( $E_F$ ), valence band energy ( $E_{\text{VB}}$ ), and conduction band energy ( $E_{\text{CB}}$ ) of the original SnO<sub>2</sub> and the CsF-modified double-layer SnO<sub>2</sub> ETLs.

| Sample               | $E_g$ (eV) | $E_{\text{cut-off}}$ (eV) | $E_F$ (eV) | $E_{\text{VB}}$ (eV) | $E_{\text{CB}}$ (eV) |
|----------------------|------------|---------------------------|------------|----------------------|----------------------|
| SnO <sub>2</sub>     | 3.60       | 16.68                     | 4.54       | 7.65                 | 4.68                 |
| CsF-SnO <sub>2</sub> | 3.63       | 16.04                     | 5.18       | 8.28                 | 4.02                 |

**Table S2.** Fitting parameters of TRPL spectra (excitation wavelength 475 nm) of perovskite films based on the original SnO<sub>2</sub> and the CsF-modified double-layer SnO<sub>2</sub> substrates.

| Sample               | $A_1$ | $\tau_1$ (ns) | $A_2$ | $\tau_2$ (ns) | $\tau_{\text{AVE}}$ (ns) |
|----------------------|-------|---------------|-------|---------------|--------------------------|
| SnO <sub>2</sub>     | 0.251 | 24.89         | 0.751 | 600.82        | 592.95                   |
| CsF-SnO <sub>2</sub> | 0.229 | 8.87          | 0.729 | 263.50        | 260.83                   |

**Table S3.** Summary of the photovoltaic parameters of the PSCs based on different concentrations of ETLs.

| Sample                         | $V_{\text{OC}}$ (V) | $J_{\text{SC}}$ (mA/cm <sup>2</sup> ) | FF    | PCE (%) |
|--------------------------------|---------------------|---------------------------------------|-------|---------|
| SnO <sub>2</sub>               | 1.114               | 23.00                                 | 0.763 | 19.80   |
| 0.5 mg/mL CsF-SnO <sub>2</sub> | 1.158               | 22.78                                 | 0.773 | 20.38   |

|                                |       |       |       |       |
|--------------------------------|-------|-------|-------|-------|
| 1.0 mg/mL CsF-SnO <sub>2</sub> | 1.159 | 23.27 | 0.778 | 20.98 |
| 2.0 mg/mL CsF-SnO <sub>2</sub> | 1.137 | 23.76 | 0.757 | 20.45 |

**Table S4.**  $V_{\text{TFL}}$  and  $N_t$  of the perovskite films based on original SnO<sub>2</sub> and CsF-modified double-layer SnO<sub>2</sub> ETLs.

| Sample               | $L$ (nm) | $\epsilon$ | $V_{\text{TFL}}$ (V) | $N_t (\times 10^{15} \text{ cm}^{-3})$ |
|----------------------|----------|------------|----------------------|----------------------------------------|
| SnO <sub>2</sub>     | 780      | 42.3       | 0.22                 | 1.69                                   |
| CsF-SnO <sub>2</sub> | 780      | 42.3       | 0.15                 | 1.15                                   |

**Table S5.** The fitted parameters of the electrical impedance spectroscopy measurements under darkness of original and CsF-modified PSCs.

| Samples              | $R_{\text{rec}} (\Omega \text{ cm}^2)$ |
|----------------------|----------------------------------------|
| SnO <sub>2</sub>     | $0.77 \times 10^4$                     |
| CsF-SnO <sub>2</sub> | $1.45 \times 10^4$                     |

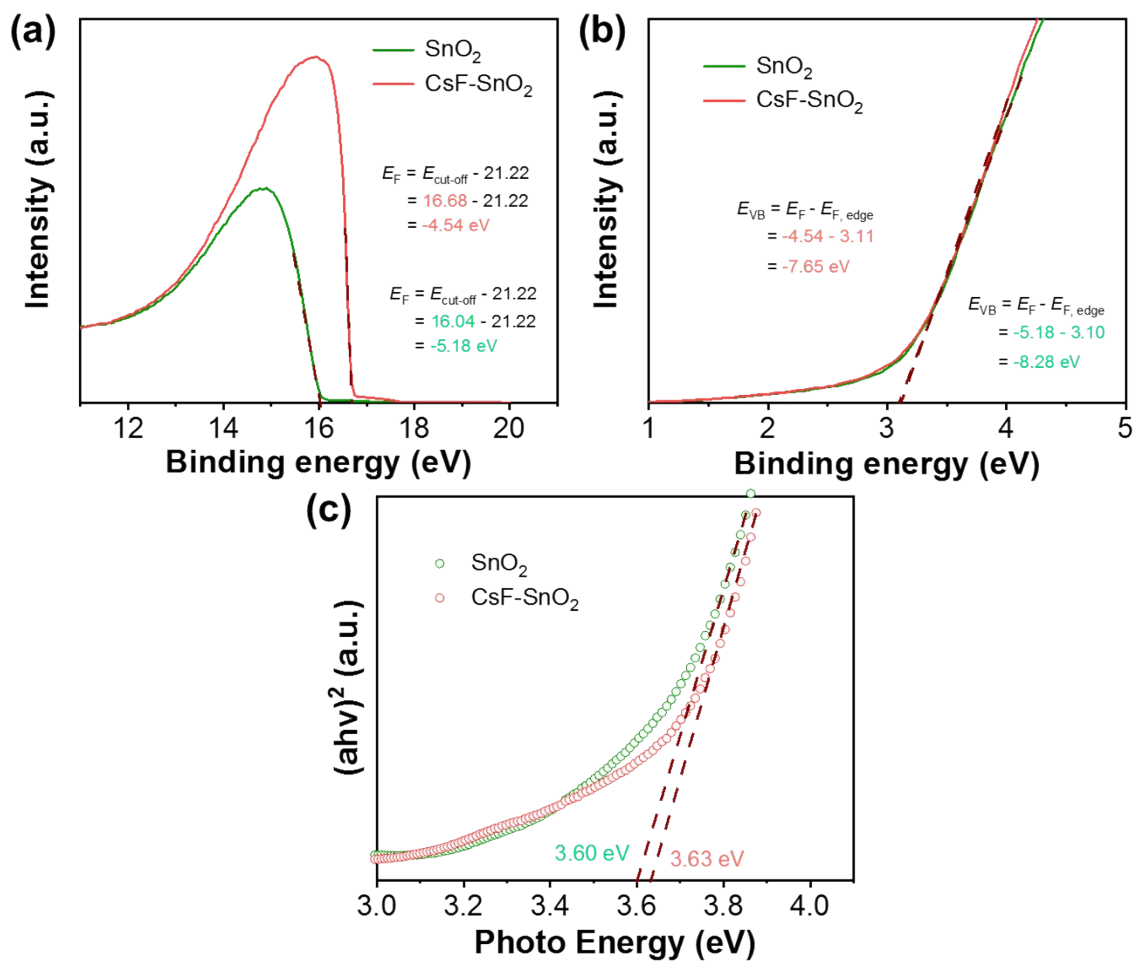

**Fig. S1** (a), (b) ultraviolet photoelectron spectroscopy and c) ultraviolet-visible spectra of the original SnO<sub>2</sub> and CsF-modified double-layer SnO<sub>2</sub> films.

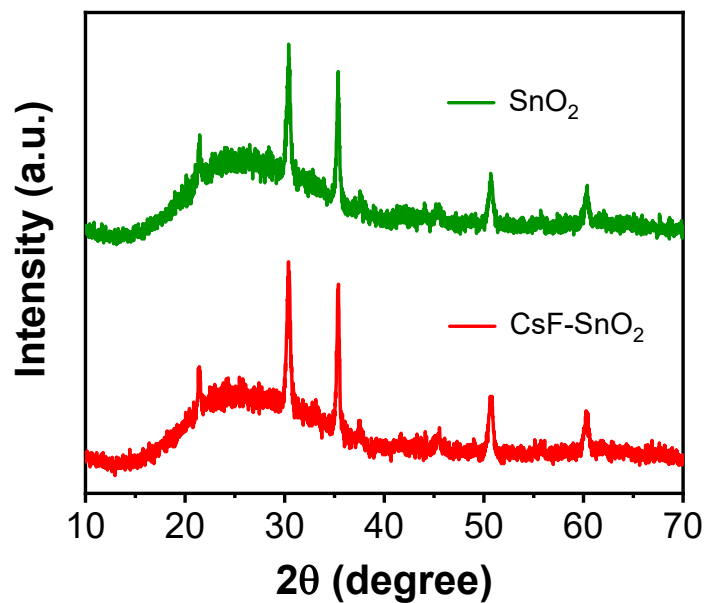

**Fig. S2** X-ray diffraction patterns of the original SnO<sub>2</sub> and CsF-modified double-layer SnO<sub>2</sub> films.

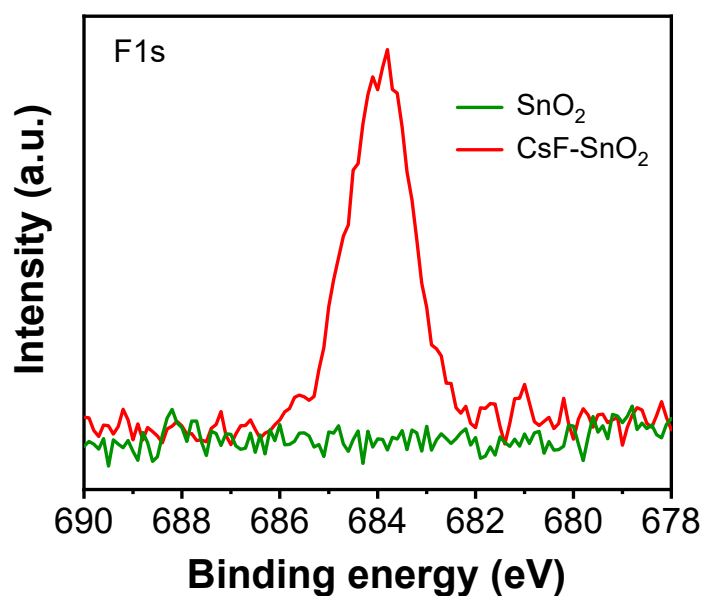

**Fig. S3** High-resolution F 1s X-ray photoelectron spectroscopy spectra of the original SnO<sub>2</sub> and CsF-modified double-layer SnO<sub>2</sub> films.

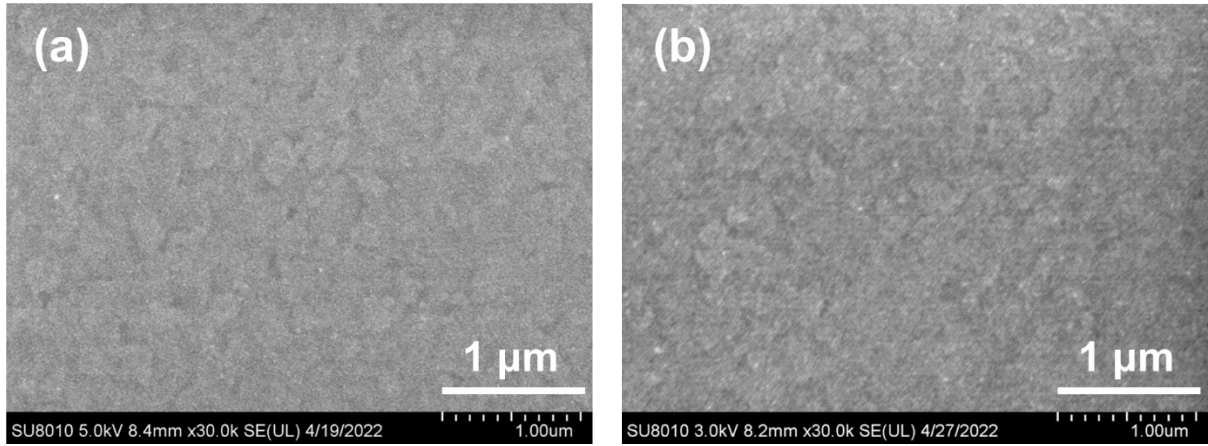

**Fig. S4** Top view scanning electron microscopy images of (a) original SnO<sub>2</sub> and (b) CsF-modified double-layer SnO<sub>2</sub> films deposited on the ITO substrates.

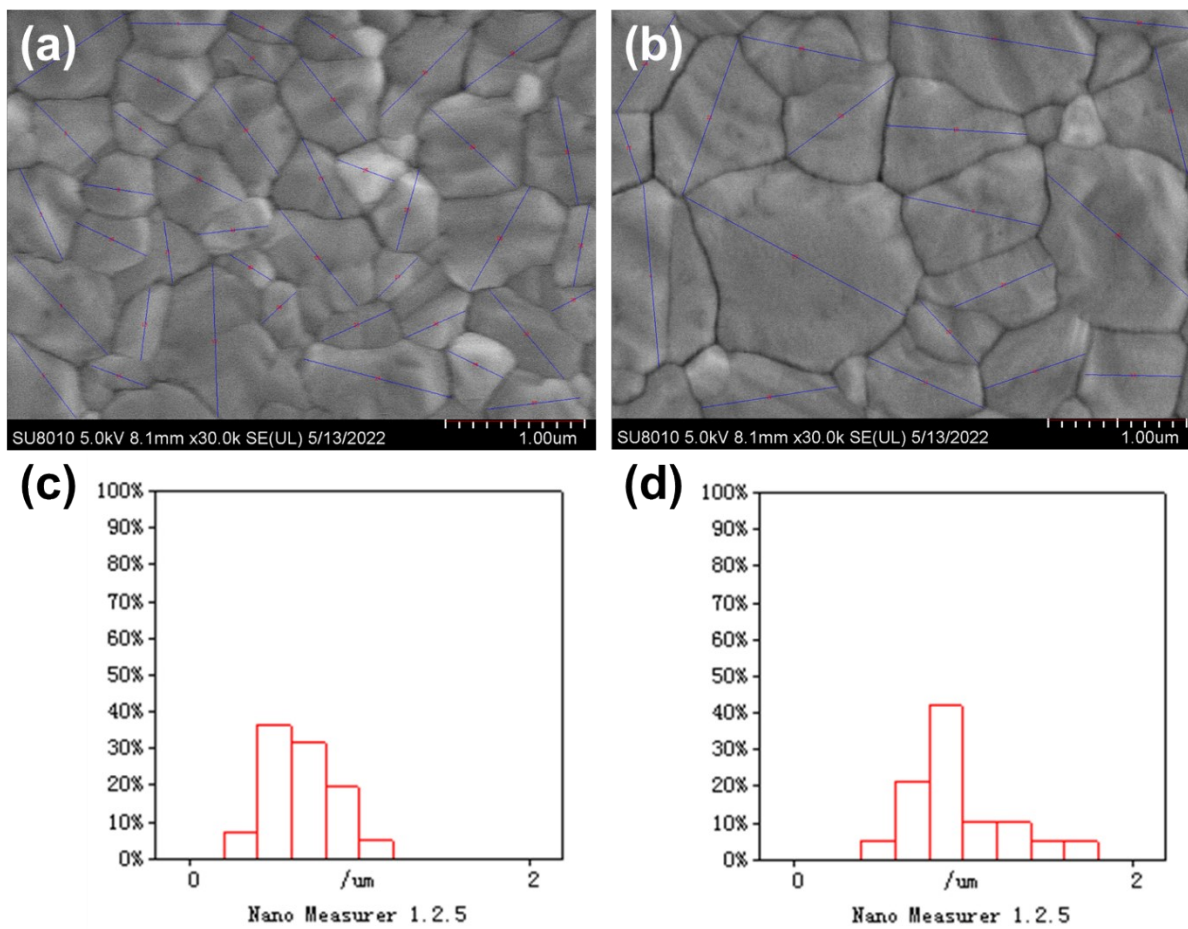

**Fig. S5** Statistical distribution diagram of grain size of perovskite films deposited on the (a), (b) original SnO<sub>2</sub> and (c), (d) CsF-modified double-layer SnO<sub>2</sub> ETLs.

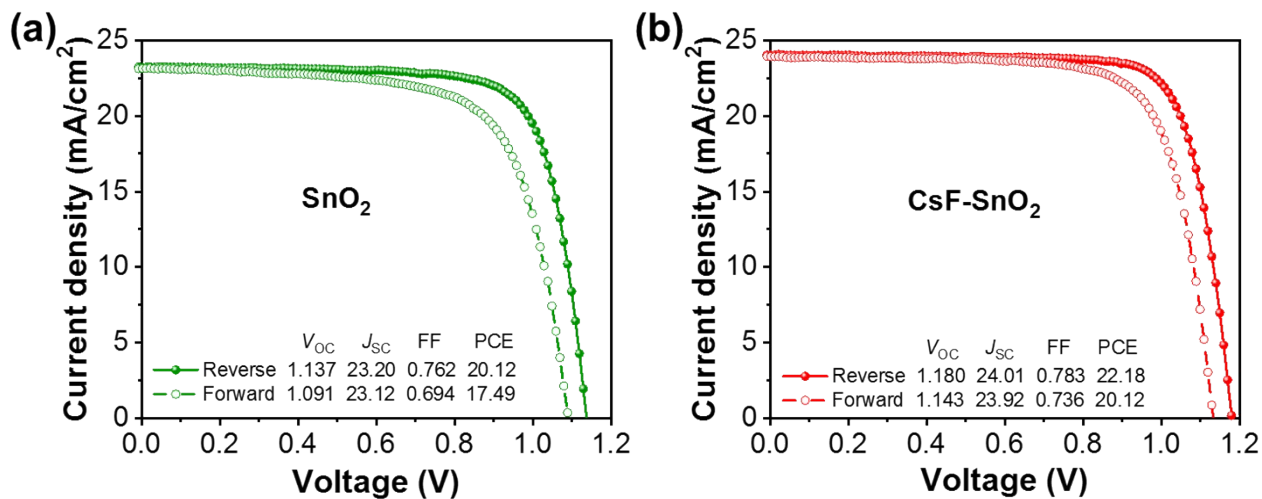

**Fig. S6**  $J$ - $V$  curves of the champion PSCs based on the (a) original  $\text{SnO}_2$  and (b) CsF-modified double-layer  $\text{SnO}_2$  ETLs.

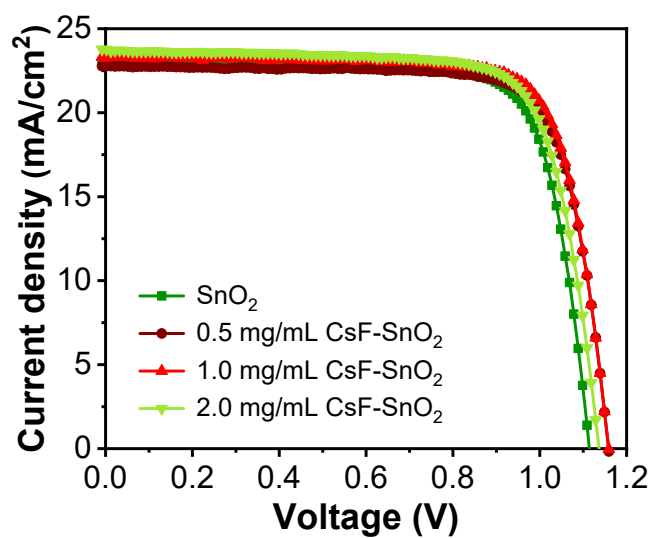

**Fig. S7**  $J$ - $V$  curves of the PSCs based on different concentrations of CsF-modified  $\text{SnO}_2$  ETLs.
